# Supplementary material for: Life Cycle Environmental Impact of High-Capacity Lithium Ion Battery with Silicon Nanowires Anode for Electric Vehicles
Source: Atypon-hosted journal article supplement (doi:10.1021/es4037786), 2014-01-31
Supplement: es4037786_si_002.pdf [file es4037786_si_002.pdf]

Supporting Information to the manuscript entitled

# **Life Cycle Environmental Impact of High Capacity Lithium Ion Battery with Silicon Nanowires Anode for Electric Vehicles**

*Bingbing Li, Xianfeng Gao, Jianyang Li, Chris Yuan\**

Department of Mechanical Engineering, University of Wisconsin-Milwaukee, Milwaukee, WI  
53211, United States

\*Corresponding author E-mail: cyuan@uwm.edu. Phone: +1 (414) 229-5639. Fax: +1 (414) 229-6958

This supporting information includes the LCA system boundary, material compositions for the battery pack using both silicon nanowire and carbon graphite anodes, life cycle inventory data, life cycle impacts assessment results and sensitivity analysis results.

Pages: 22

Tables: 28

Figures: 8

## Material Composition

Table S1 Material composition of lithium ion battery with SiNW anode (total mass: 120kg)

| Component                 | Material name                                                               | Mass (kg) | Percent mass (%) |
|---------------------------|-----------------------------------------------------------------------------|-----------|------------------|
| Anode (7:2:1)             | Silicon nanowire                                                            | 10.80     | 9.0              |
|                           | Carbon black                                                                | 3.12      | 2.6              |
|                           | Copper foil (12 $\mu$ m)                                                    | 9.36      | 7.8              |
| Cathode(92:4:4)           | Aluminum foil                                                               | 10.26     | 8.6              |
|                           | Carbon black                                                                | 0.54      | 0.4              |
|                           | Umicore NMC ( $\text{LiNi}_{1/3}\text{Mn}_{1/3}\text{Co}_{1/3}\text{O}_2$ ) | 11.88     | 9.9              |
| Binder                    | SBR+CMC binder (10-20 $\mu$ m, 1:1)                                         | 1.56      | 1.3              |
| Separator                 | PE (20 $\mu$ m, 1.2 g/cm <sup>3</sup> )                                     | 2.64      | 2.2              |
| Casing                    | Poly-aluminum-poly (200 $\mu$ m)                                            | 14.76     | 12.3             |
| Electrolyte               | Lithium hexafluorophosphate (LiPF <sub>6</sub> , 1M)                        | 12.24     | 10.2             |
|                           | Ethyl carbonate: ethyl-methyl carbonate (EC:EMC) 1:1                        |           |                  |
| Battery Management System | Copper wires                                                                | 1.20      | 1.0              |
|                           | Stainless steel                                                             | 0.96      | 0.8              |
|                           | Printed circuit board                                                       | 0.24      | 0.2              |
| Pack housing              | Polyethylene terephthalate                                                  | 20.40     | 17.0             |
| Passive cooling system    | Stainless steel                                                             | 0.60      | 0.5              |
|                           | Aluminum                                                                    | 19.44     | 16.2             |

Table S2 Material composition of lithium ion battery with graphite anode (total mass: 360kg)

| Component       | Material name                                                               | Mass(kg) | Percent mass (%) |
|-----------------|-----------------------------------------------------------------------------|----------|------------------|
| Anode (94:3:3)  | Artificial Graphite                                                         | 45.00    | 12.5             |
|                 | Carbon black                                                                | 1.44     | 0.4              |
|                 | Copper foil                                                                 | 19.08    | 5.3              |
| Cathode(92:4:4) | Aluminum foil                                                               | 17.28    | 4.8              |
|                 | Carbon black                                                                | 2.16     | 0.6              |
|                 | Umicore NMC ( $\text{LiNi}_{1/3}\text{Mn}_{1/3}\text{Co}_{1/3}\text{O}_2$ ) | 48.60    | 13.5             |
| Binder          | SBR/CMC                                                                     | 1.44     | 0.4              |
|                 | PVDF                                                                        | 2.16     | 0.6              |
| Separator       | Celgard Polyethylene                                                        | 7.92     | 2.2              |
| Casing          | Poly-aluminum-poly                                                          | 44.28    | 12.3             |
| Electrolyte     | Lithium hexafluorophosphate (LiPF <sub>6</sub> , 1M)                        | 4.32     | 1.2              |
|                 | Ethyl carbonate and ethyl methyl carbonate                                  | 37.80    | 10.5             |

|                           |                            |       |      |
|---------------------------|----------------------------|-------|------|
|                           | (EC:EMC 1:1)               |       |      |
| Battery Management System | Copper wires               | 3.60  | 1.0  |
|                           | Stainless steel            | 2.88  | 0.8  |
|                           | Printed circuit board      | 0.72  | 0.2  |
| Pack housing              | Polyethylene terephthalate | 61.20 | 17.0 |
| Passive cooling system    | Stainless steel            | 1.80  | 0.5  |
|                           | Aluminum                   | 58.32 | 16.2 |

### Silicon Nanowire Preparation Process

325 Mesh silicon powders (Aldrich, 99.99%) were firstly cleaned sequentially by acetone, ethanol, and deionized water to remove the organic containments and followed by hydrophilic treatment using boiling solution of  $\text{NH}_3 \cdot \text{H}_2\text{O}$ ,  $\text{H}_2\text{O}_2$  and  $\text{H}_2\text{O}$  (1:1:5, volume ratio) for 10 minutes. The dioxide layer was etched away in the following procedure to form nanowire structures. The pretreated Si powders were placed in PTFE beaker and then add certain amount of  $\text{H}_2\text{O}$ , HF, and  $\text{AgNO}_3$  solution (1:1:3, volume ratio) successively. Silver plating took 30 seconds for processing. Then certain amount of  $\text{H}_2\text{O}_2$  was slowly added using syringe. The resultant porous silicon was rinsed with copious water and then split into two portions. One was dried directly in vacuum oven and the other portion was washed with concentrated nitric acid (5%) for 15 minutes in order to remove the residual silver. The prepared porous Si material was mixed with carbon black and CMC glue (8:1:1, weight ratio) and coated onto copper foil (5  $\mu\text{m}$ ) to make disk-like electrode (1/2 inch).

The reduction of  $\text{Ag}^+$  process and the chemical etching process can be expressed as follows:

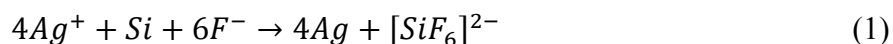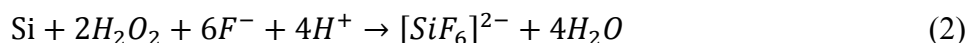

Table S3 Nano-particle emissions in various sizes from the SiNW synthesis process.

| Particle size (nm) | G(d) | C(d) | Particle size (nm) | G(d) | C(d) |
|--------------------|------|------|--------------------|------|------|
| 255.0              | 26   | 5    | 655.0              | 99   | 55   |

|       |     |    |        |    |    |
|-------|-----|----|--------|----|----|
| 309.4 | 44  | 10 | 700.8  | 97 | 60 |
| 352.7 | 58  | 15 | 751.8  | 93 | 65 |
| 391.1 | 70  | 20 | 809.6  | 87 | 70 |
| 427.7 | 80  | 25 | 877.0  | 80 | 75 |
| 463.3 | 87  | 30 | 959.1  | 70 | 80 |
| 498.9 | 93  | 35 | 1063.5 | 58 | 85 |
| 535.2 | 97  | 40 | 1212.4 | 44 | 90 |
| 572.7 | 99  | 45 | 1471.0 | 26 | 95 |
| 612.4 | 100 | 50 |        |    |    |

G(d) represents relative percentage contribution of the size range. C (d) represents cumulated percentage contribution

# The Gabi Model of Battery Manufacturing

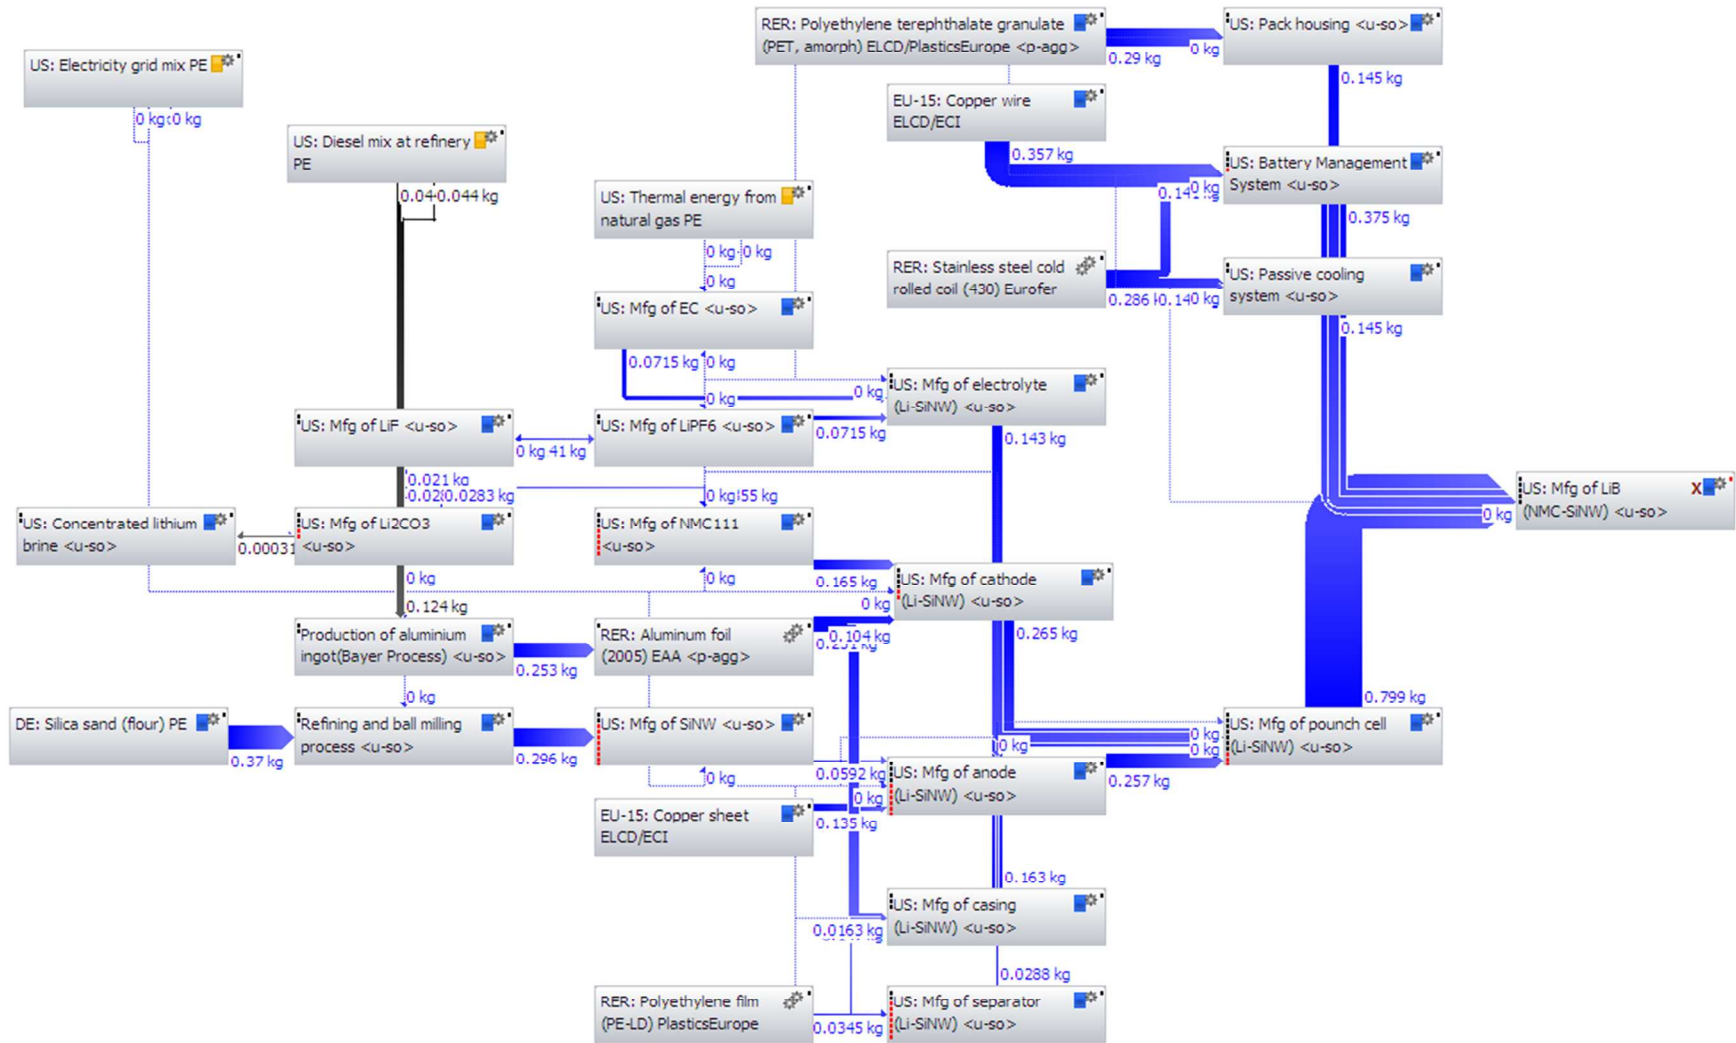

Figure S1 GaBi model structure of battery manufacturing

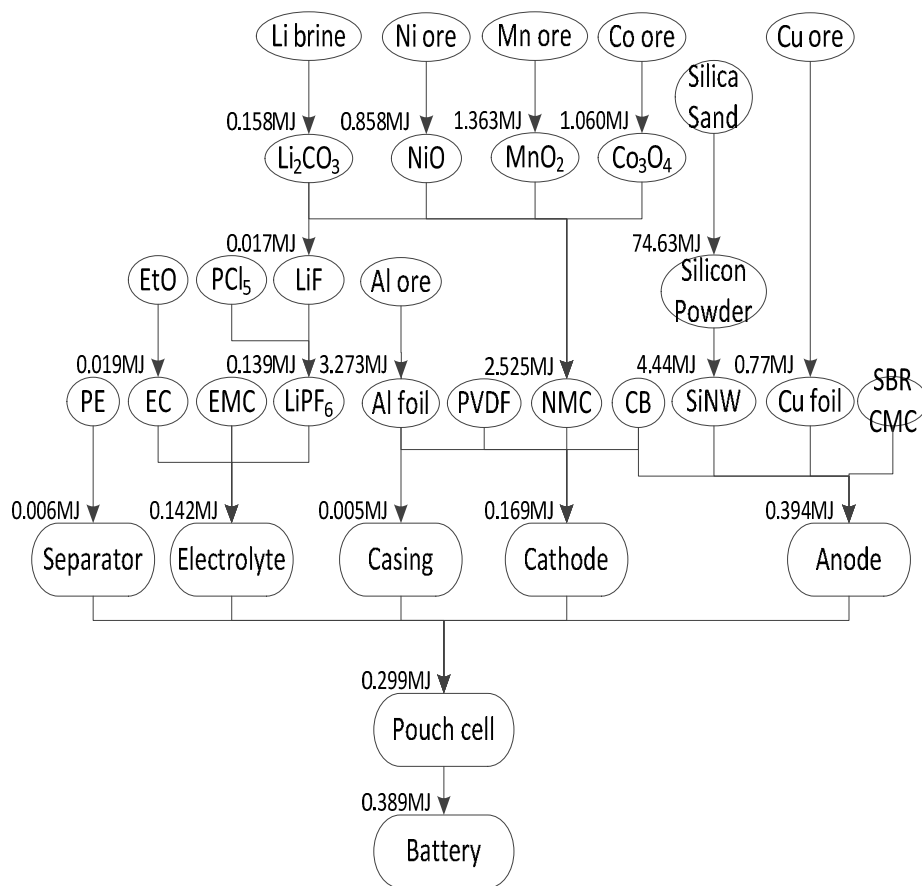

Figure S2 Energy consumption of manufacturing processes for 1kg LiB with SiNW anode

### Life Cycle Inventory of Battery Manufacturing

Table S4 Production of aluminum ingot

| Flow                              | Quantity                     | Amount | Unit |
|-----------------------------------|------------------------------|--------|------|
| <b>Inputs</b>                     |                              |        |      |
| Diesel [Refinery products]        | Mass                         | 0.4888 | kg   |
| Electricity [Electric power]      | Energy (net calorific value) | 2      | MJ   |
| Bauxite [Non renewable resources] | Mass                         | 132    | kg   |
| <b>Outputs</b>                    |                              |        |      |
| Aluminum ingot [Metals]           | Mass                         | 1      | kg   |

The production of aluminum ingot is based on Bayer process. The process dissolves the aluminum component of bauxite ore in hot sodium hydroxide (caustic soda), removes impurities from the solution, precipitates alumina trihydrate, which is then calcined into aluminum oxide<sup>1</sup>.

Table S5 Production of Concentrated lithium brine

| Flow                                                              | Quantity                     | Amount | Unit |
|-------------------------------------------------------------------|------------------------------|--------|------|
| Inputs                                                            |                              |        |      |
| Diesel [Refinery products]                                        | Mass                         | 0.194  | kg   |
| Electricity [Electric power]                                      | Energy (net calorific value) | 0.32   | MJ   |
| Lithium ore (3%) [Non renewable resources]                        | Mass                         | 0.067  | kg   |
| outputs                                                           |                              |        |      |
| GLO: concentrated lithium brine (6.7 % Li), at plant [inorganics] | Mass                         | 1      | kg   |

The basic approach of production of concentrated lithium brine is to concentrate the lithium even more by putting brine into evaporation ponds<sup>2</sup>.

Table S6 Manufacturing of Li<sub>2</sub>CO<sub>3</sub>

| Flow                                                                                  | Quantity                     | Amount       | Unit            |
|---------------------------------------------------------------------------------------|------------------------------|--------------|-----------------|
| Inputs                                                                                |                              |              |                 |
| Diesel [Refinery products]                                                            | Mass                         | 0.284        | kg              |
| Electricity [Electric power]                                                          | Energy (net calorific value) | 5.6          | MJ              |
| GLO: concentrated lithium brine (6.7 % Li), at plant [inorganics]                     | Mass                         | 0.0571       | kg              |
| RER: natural gas, burned in industrial furnace >100kW [heating systems]               | Energy (net calorific value) | 6.09         | MJ              |
| RER: natural gas, high pressure, at consumer [fuels]                                  | Energy (net calorific value) | 2            | MJ              |
| CH: quicklime, milled, loose, at plant [additives]                                    | Mass                         | 0.0144       | kg              |
| DE: bentonite, at processing [additives]                                              | Mass                         | 0.176        | kg              |
| DZ: natural gas, liquefied, at freight ship [Appropriation]                           | Standard volume              | 9.53E-5      | Nm <sup>3</sup> |
| GLO: solvents, organic, unspecified, at plant [organics]                              | Mass                         | 0.00475      | kg              |
| RER: 2-methyl-2-butanol, at plant [organics]                                          | Mass                         | 0.00119      | kg              |
| RER: chemical plant, organics [organics]                                              | Number of pieces             | 4E-10        | pcs.            |
| RER: hydrochloric acid, 30% in H <sub>2</sub> O, at plant [inorganics]                | Mass                         | 9.38         | kg              |
| RER: soda, powder, at plant [inorganics]                                              | Mass                         | 3.73         | kg              |
| RER: sodium hydroxide, 50% in H <sub>2</sub> O, production mix, at plant [inorganics] | Mass                         | 0.00018<br>8 | kg              |
| RER: sulphuric acid, liquid, at plant [inorganics]                                    | Mass                         | 0.0357       | kg              |



|                                                                                                                   |                                        |          |     |
|-------------------------------------------------------------------------------------------------------------------|----------------------------------------|----------|-----|
| RER: transport, lorry 16-32t, EURO3 [Street]                                                                      | Ecoinvent quantity ton kilometer (tkm) | 2.59     | tkm |
| RER: transport, lorry 3.5-7.5t, EURO3 [Street]                                                                    | Ecoinvent quantity ton kilometer (tkm) | 0.0024   | tkm |
| outputs                                                                                                           |                                        |          |     |
| GLO: lithium carbonate, at plant [inorganics]                                                                     | Mass                                   | 1        | kg  |
| CH: disposal, decarbonising waste, 30% water, to residual material landfill [residual material landfill facility] | Mass                                   | 6.41     | kg  |
| DE: disposal, hazardous waste, 0% water, to underground deposit [underground deposit]                             | Mass                                   | 0.000205 | kg  |
| Waste heat [Other emissions to air]                                                                               | Energy (net calorific value)           | 0.00202  | MJ  |

Table S7 Manufacturing of NMC111

| Flow                                                                                               | Quantity                               | Amount | Unit |
|----------------------------------------------------------------------------------------------------|----------------------------------------|--------|------|
| Inputs                                                                                             |                                        |        |      |
| Cobalt oxide [Inorganic intermediate products]                                                     | Mass                                   | 0.306  | kg   |
| Electricity [Electric power]                                                                       | Energy (net calorific value)           | 0.0180 | MJ   |
| GLO: lithium carbonate, at plant [inorganics]                                                      | Mass                                   | 0.215  | kg   |
| Manganese oxide [Inorganic intermediate products]                                                  | Mass                                   | 0.306  | kg   |
| Nickel oxide [Inorganic intermediate products]                                                     | Mass                                   | 0.306  | kg   |
| RER: nitrogen, liquid, at plant [inorganics]                                                       | Mass                                   | 0.786  | kg   |
| RER: oxygen, liquid, at plant [inorganics]                                                         | Mass                                   | 0.715  | kg   |
| Thermal energy (MJ) [Thermal energy]                                                               | Energy (net calorific value)           | 15.3   | MJ   |
| CH: water, deionised, at plant [Appropriation]                                                     | Mass                                   | 3.4    | kg   |
| RER: chemical plant, organics [organics]                                                           | Number of pieces                       | 4E-10  | pcs. |
| RER: transport, lorry >16t, fleet average [Street]                                                 | Ecoinvent quantity ton kilometer (tkm) | 0.564  | tkm  |
| US: transport, freight, rail, diesel [Railway]                                                     | Ecoinvent quantity ton kilometer (tkm) | 3.23   | tkm  |
| outputs                                                                                            |                                        |        |      |
| Lithium nickel-cobalt-manganese oxide [Inorganic intermediate products]                            | Mass                                   | 1      | kg   |
| CH: disposal, inert waste, 5% water, to inert material landfill [inert material landfill facility] | Mass                                   | 0.0566 | kg   |
| CH: heat, biowaste, at waste incineration plant, allocation price [municipal incineration]         | Energy (net calorific value)           | 0.018  | MJ   |
| RER: potassium carbonate from manganese dioxide oxidation, at plant [inorganics]                   | Mass                                   | 0.128  | kg   |
| Water vapor (sewage correction) [Thermal energy]                                                   | Mass                                   | 3.4    | kg   |

Table S8 Manufacturing of cathode

| Flow                                                                                                | Quantity                               | Amount   | Unit |
|-----------------------------------------------------------------------------------------------------|----------------------------------------|----------|------|
| Inputs                                                                                              |                                        |          |      |
| Aluminum foil [Metals]                                                                              | Mass                                   | 0.393    | kg   |
| Electricity [Electric power]                                                                        | Energy (net calorific value)           | 0.6377   | MJ   |
| GLO: Carbon black, at plant [inorganics]                                                            | Mass                                   | 0.0264   | kg   |
| Lithium nickel-cobalt-manganese oxide [Inorganic intermediate products]                             | Mass                                   | 0.623    | kg   |
| RER: sheet rolling, aluminum [processing]                                                           | Mass                                   | 0.393    | kg   |
| Thermal energy (MJ) [Thermal energy]                                                                | Energy (net calorific value)           | 0.646    | MJ   |
| CH: water, deionised, at plant [Appropriation]                                                      | Mass                                   | 0.2      | kg   |
| RER: chemical plant, organics [organics]                                                            | Number of pieces                       | 4E-10    | pcs. |
| RER: latex, at plant [organics]                                                                     | Mass                                   | 0.00989  | kg   |
| RER: sodium hydroxide, 50% in H2O, production mix, at plant [inorganics]                            | Mass                                   | 0.13     | kg   |
| RER: transport, freight, rail [Railway]                                                             | Ecoinvent quantity ton kilometer (tkm) | 0.758    | tkm  |
| RER: transport, lorry >16t, fleet average [Street]                                                  | Ecoinvent quantity ton kilometer (tkm) | 0.126    | tkm  |
| Sulfamic acid [Inorganic emissions to air]                                                          | Mass                                   | 0.0808   | kg   |
| RER: transport, lorry >16t, fleet average [Street]                                                  | Ecoinvent quantity ton kilometer (tkm) | 0.126    | kg   |
| outputs                                                                                             |                                        |          |      |
| CN: Cathode, lithium-ion battery, lithium manganese oxide, at plant [Parts]                         | Mass                                   | 1        | kg   |
| CH: disposal, residues, shredder fraction from manual dismantling, in MSWI [municipal incineration] | Mass                                   | 0.0526   | kg   |
| CH: treatment, sewage, to wastewater treatment, class 3 [wastewater treatment]                      | Volume                                 | 0.000105 | m3   |
| Waste heat [Other emissions to air]                                                                 | Energy (net calorific value)           | 0.0072   | MJ   |
| Water vapor [Inorganic emissions to air]                                                            | Mass                                   | 0.2      | kg   |

Table S9 Refining and ball milling process

| Flow                                                           | Quantity                     | Amount  | Unit |
|----------------------------------------------------------------|------------------------------|---------|------|
| Inputs                                                         |                              |         |      |
| Electricity [Electric power]                                   | Energy (net calorific value) | 252.144 | MJ   |
| Silica flour (fine) [Minerals]                                 | Mass                         | 1.25    | kg   |
| Outputs                                                        |                              |         |      |
| 325 Mesh Silicon Powder (44 microns) [Non renewable resources] | Mass                         | 1       | kg   |

The basic process of processing silicon from silica sand (80% purity) to mesh silicon powder (99.99% purity) is carbothermic reduction, chemical purification (fluid bed combustion technology, distillation, CVD deposition) and ball milling. The energy requirement is from literature<sup>3,4</sup>.

Table S10 Manufacturing of silicon nanowire

| Flow                                                                      | Quantity                     | Amount   | Unit |
|---------------------------------------------------------------------------|------------------------------|----------|------|
| <b>Inputs</b>                                                             |                              |          |      |
| 325 Mesh Silicon Powder (44 microns) [Non renewable resources]            | Mass                         | 5        | kg   |
| Acetone (dimethyl ketone) [Organic intermediate products]                 | Mass                         | 14.5     | kg   |
| Ammonium hydroxide (NH <sub>4</sub> OH) [Inorganic intermediate products] | Mass                         | 4.4      | kg   |
| Electricity [Electric power]                                              | Energy (net calorific value) | 75       | MJ   |
| Ethanol (96%) [Organic intermediate products]                             | Mass                         | 14.4     | kg   |
| Hydrogen fluoride [Inorganic intermediate products]                       | Mass                         | 142      | kg   |
| Hydrogen peroxide (100%) [Inorganic intermediate products]                | Mass                         | 63.6     | kg   |
| Nitric acid (5%) [Inorganic intermediate products]                        | Mass                         | 3.7      | kg   |
| Silver nitrate [Inorganic intermediate products]                          | Mass                         | 1.2275   | kg   |
| <b>outputs</b>                                                            |                              |          |      |
| Silicon nanowire [Non renewable resources]                                | Mass                         | 1        | kg   |
| Waste heat [Other emissions to air]                                       | Energy (net calorific value) | 3.72     | MJ   |
| Solid waste Ag                                                            | Mass                         | 0.78     | kg   |
| Si waste                                                                  | Mass                         | 4        | Kg   |
| Solution waste                                                            | Mass                         | 314.3275 | kg   |

Table S11 Manufacturing of anode

| Flow                                               | Quantity                     | Amount | Unit |
|----------------------------------------------------|------------------------------|--------|------|
| <b>Inputs</b>                                      |                              |        |      |
| CN: graphite, battery grade, at plant [inorganics] | Mass                         | 0.494  | kg   |
| Copper sheet [Metals]                              | Mass                         | 0.524  | Kg   |
| Electricity [Electric power]                       | Energy (net calorific value) | 1.5331 | Kg   |
| GLO: Carbon black, at plant [inorganics]           | Mass                         | 0.0159 | MJ   |
| RER: copper, at regional storage [Beneficiation]   | Mass                         | 0.524  | Kg   |

|                                                                                |                                        |          |     |
|--------------------------------------------------------------------------------|----------------------------------------|----------|-----|
| RER: latex, at plant [organics]                                                | Mass                                   | 0.0185   | Kg  |
| RER: sodium hydroxide, 50% in H2O, production mix, at plant [inorganics]       | Mass                                   | 0.132    | Kg  |
| Silicon nanowire [Non renewable resources]                                     | Mass                                   | 0.23     | Kg  |
| Sulfamic acid [Inorganic emissions to air]                                     | Mass                                   | 0.0808   | MJ  |
| Thermal energy (MJ) [Thermal energy]                                           | Energy (net calorific value)           | 1.22     | kg  |
| CH: water, deionised, at plant [Appropriation]                                 | Mass                                   | 0.424    | Tkm |
| RER: transport, lorry >16t, fleet average [Street]                             | Ecoinvent quantity ton kilometer (tkm) | 0.113    | tkm |
| US: transport, freight, rail, diesel [Railway]                                 | Ecoinvent quantity ton kilometer (tkm) | 0.47     | tkm |
| outputs                                                                        |                                        |          |     |
| CN: Anode, lithium-ion battery, graphite, at plant [Parts]                     | Mass                                   | 1        | kg  |
| CH: treatment, sewage, to wastewater treatment, class 3 [wastewater treatment] | Volume                                 | 0.000106 | m3  |
| Waste heat [Other emissions to air]                                            | Energy (net calorific value)           | 0.0072   | MJ  |
| Water vapor [Inorganic emissions to air]                                       | Mass                                   | 0.424    | kg  |

Table S12 Manufacturing of LiF

| Flow                                                                           | Quantity                               | Amount  | Unit |
|--------------------------------------------------------------------------------|----------------------------------------|---------|------|
| Inputs                                                                         |                                        |         |      |
| RER: heat, natural gas, at industrial furnace >100kW [heating systems]         | Energy (net calorific value)           | 1.21    | MJ   |
| CH: water, deionised, at plant [Appropriation]                                 | Mass                                   | 2.21    | kg   |
| GLO: hydrogen fluoride, at plant [inorganics]                                  | Mass                                   | 0.806   | kg   |
| GLO: lithium carbonate, at plant [inorganics]                                  | Mass                                   | 1.49    | kg   |
| RER: ammonia, liquid, at regional storehouse [inorganics]                      | Mass                                   | 0.0328  | kg   |
| RER: chemical plant, organics [organics]                                       | Number of pieces                       | 4E-10   | pcs. |
| RER: transport, lorry >16t, fleet average [Street]                             | Ecoinvent quantity ton kilometer (tkm) | 0.233   | tkm  |
| US: transport, freight, rail, diesel [Railway]                                 | Ecoinvent quantity ton kilometer (tkm) | 1.4     | tkm  |
| outputs                                                                        |                                        |         |      |
| CN: lithium fluoride, at plant [inorganics]                                    | Mass                                   | 1       | kg   |
| Carbon dioxide [Inorganic intermediate products]                               | Mass                                   | 0.886   | kg   |
| Hydrogen fluoride [Inorganic intermediate products]                            | Mass                                   | 0.0363  | kg   |
| Ammonium [Inorganic emissions to air]                                          | Mass                                   | 0.0347  | kg   |
| CH: treatment, sewage, to wastewater treatment, class 1 [wastewater treatment] | Volume                                 | 0.00357 | m3   |
| GLO: lithium carbonate, at plant [inorganics]                                  | Mass                                   | 0.067   | kg   |

Table S13 Manufacturing of LiPF<sub>6</sub>

| Flow                                                                                                     | Quantity                               | Amount  | Unit |
|----------------------------------------------------------------------------------------------------------|----------------------------------------|---------|------|
| <b>Inputs</b>                                                                                            |                                        |         |      |
| CN: lithium fluoride, at plant [inorganics]                                                              | Mass                                   | 0.197   | kg   |
| CN: phosphorous pentachloride, at plant [inorganics]                                                     | Mass                                   | 1.98    | kg   |
| GLO: hydrogen fluoride, at plant [inorganics]                                                            | Mass                                   | 4.04    | kg   |
| RER: nitrogen, liquid, at plant [inorganics]                                                             | Mass                                   | 0.00125 | kg   |
| US: electricity, medium voltage, at grid [supply mix]                                                    | Energy (net calorific value)           | 1.9476  | MJ   |
| RER: chemical plant, organics [organics]                                                                 | Number of pieces                       | 4E-10   | pcs. |
| RER: transport, lorry >16t, fleet average [Street]                                                       | Ecoinvent quantity ton kilometer (tkm) | 1.37    | tkm  |
| US: transport, freight, rail, diesel [Railway]                                                           | Ecoinvent quantity ton kilometer (tkm) | 8.19    | tkm  |
| <b>outputs</b>                                                                                           |                                        |         |      |
| CN: lithium hexafluorophosphate, at plant [inorganics]                                                   | Mass                                   | 1       | kg   |
| CN: lithium fluoride, at plant [inorganics]                                                              | Mass                                   | 0.0262  | kg   |
| CH: disposal, limestone residue, 5% water, to inert material landfill [inert material landfill facility] | Mass                                   | 8.61    | kg   |
| CH: treatment, sewage, to wastewater treatment, class 1 [wastewater treatment]                           | Volume                                 | 0.00361 | m3   |
| Phosphorus trichloride [Inorganic emissions to air]                                                      | Mass                                   | 0.263   | kg   |
| Waste heat [Other emissions to air]                                                                      | Energy (net calorific value)           | 1.95    | MJ   |

Table S14 manufacturing of EC

| Flow                                                                                                     | Quantity                               | Amount  | Unit |
|----------------------------------------------------------------------------------------------------------|----------------------------------------|---------|------|
| <b>Inputs</b>                                                                                            |                                        |         |      |
| RER: carbon dioxide liquid, at plant [inorganics]                                                        | Mass                                   | 0.505   | kg   |
| RER: chemical plant, organics [organics]                                                                 | Number of pieces                       | 4E-10   | pcs. |
| RER: ethylene oxide, at plant [organics]                                                                 | Mass                                   | 0.501   | kg   |
| RER: heat, natural gas, at industrial furnace >100kW [heating systems]                                   | Energy (net calorific value)           | 0.143   | MJ   |
| RER: transport, lorry >16t, fleet average [Street]                                                       | Ecoinvent quantity ton kilometer (tkm) | 0.101   | tkm  |
| US: electricity, medium voltage, at grid [supply mix]                                                    | Energy (net calorific value)           | 0.042   | MJ   |
| US: transport, freight, rail, diesel [Railway]                                                           | Ecoinvent quantity ton kilometer (tkm) | 0.351   | tkm  |
| <b>outputs</b>                                                                                           |                                        |         |      |
| CN: ethylene carbonate, at plant [organics]                                                              | Mass                                   | 1       | kg   |
| Ethylene oxide [Group NMVOC to air]                                                                      | Mass                                   | 0.00025 | kg   |
| Carbon dioxide [Inorganic emissions to air]                                                              | Mass                                   | 0.0053  | kg   |
| CH: disposal, catalyst base Eth.oxide prod., 0% water, to residual material landfill [residual material] | Mass                                   | 0.005   | kg   |

|                                     |                              |        |    |
|-------------------------------------|------------------------------|--------|----|
| landfill facility]                  |                              |        |    |
| Waste heat [Other emissions to air] | Energy (net calorific value) | 0.0072 | MJ |

Table S15 Manufacturing of separator

| Flow                                                                                                | Quantity                               | Amount | Unit |
|-----------------------------------------------------------------------------------------------------|----------------------------------------|--------|------|
| <b>Inputs</b>                                                                                       |                                        |        |      |
| DE: silica sand, at plant [additives]                                                               | Mass                                   | 0.218  | kg   |
| Electricity [Electric power]                                                                        | Energy (net calorific value)           | 0.2083 | MJ   |
| GLO: hexafluorethane, at plant [organics]                                                           | Mass                                   | 0.0262 | kg   |
| Polyethylene-film (PE) [Plastic parts]                                                              | Mass                                   | 1.2    | kg   |
| RER: acetone, liquid, at plant [organics]                                                           | Mass                                   | 0.144  | kg   |
| RER: fleece, polyethylene, at plant [polymers]                                                      | Mass                                   | 0.351  | kg   |
| RER: heat, natural gas, at industrial furnace >100kW [heating systems]                              | Energy (net calorific value)           | 0.193  | MJ   |
| RER: phthalic anhydride, at plant [organics]                                                        | Mass                                   | 0.291  | kg   |
| US: polyvinyl fluoride, at plant [organics]                                                         | Mass                                   | 0.192  | kg   |
| RER: chemical plant, organics [organics]                                                            | Number of pieces                       | 4E-10  | pcs. |
| RER: transport, lorry >16t, fleet average [Street]                                                  | Ecoinvent quantity ton kilometer (tkm) | 0.0984 | tkm  |
| US: transport, freight, rail, diesel [Railway]                                                      | Ecoinvent quantity ton kilometer (tkm) | 0.525  | tkm  |
| <b>outputs</b>                                                                                      |                                        |        |      |
| CN: separator, lithium-ion battery, at plant [Parts]                                                | Mass                                   | 1      | kg   |
| Acetone (dimethyl ketone) [Group NMVOC to air]                                                      | Mass                                   | 0.0144 | kg   |
| CH: disposal, residues, shredder fraction from manual dismantling, in MSWI [municipal incineration] | Mass                                   | 0.0539 | kg   |
| Waste heat [Other emissions to air]                                                                 | Energy (net calorific value)           | 0.0072 | MJ   |

Table S16 Manufacturing of electrolyte

| Flow                                                   | Quantity                     | Amount | Unit |
|--------------------------------------------------------|------------------------------|--------|------|
| <b>Inputs</b>                                          |                              |        |      |
| CN: ethylene carbonate, at plant [organics]            | Mass                         | 0.5    | kg   |
| CN: lithium hexafluorophosphate, at plant [inorganics] | Mass                         | 0.5    | kg   |
| Electricity [Electric power]                           | Energy (net calorific value) | 0.0209 | MJ   |
| <b>outputs</b>                                         |                              |        |      |
| Electrolyte [Operating materials]                      | Mass                         | 1      | kg   |

Table S17 Manufacturing of casing

| Flow                                   | Quantity                     | Amount | Unit |
|----------------------------------------|------------------------------|--------|------|
| Inputs                                 |                              |        |      |
| Aluminum foil [Metals]                 | Mass                         | 0.9    | kg   |
| Electricity [Electric power]           | Energy (net calorific value) | 0.0306 | MJ   |
| Polyethylene-film (PE) [Plastic parts] | Mass                         | 0.1    | kg   |
| outputs                                |                              |        |      |
| Casing [Assemblies]                    | Mass                         | 1      | kg   |

Table S18 Manufacturing of pouch cell

| Flow                                                                                     | Quantity                               | Amount | Unit |
|------------------------------------------------------------------------------------------|----------------------------------------|--------|------|
| Inputs                                                                                   |                                        |        |      |
| Casing [Assemblies]                                                                      | Mass                                   | 0.204  | kg   |
| CN: Anode, lithium-ion battery, graphite, at plant [Parts]                               | Mass                                   | 0.322  | kg   |
| CN: Cathode, lithium-ion battery, lithium manganese oxide, at plant [Parts]              | Mass                                   | 0.332  | kg   |
| CN: separator, lithium-ion battery, at plant [Parts]                                     | Mass                                   | 0.036  | kg   |
| Electricity [Electric power]                                                             | Energy (net calorific value)           | 0.3816 | MJ   |
| Electrolyte [Assemblies]                                                                 | Mass                                   | 0.179  | kg   |
| RER: aluminum, production mix, wrought alloy, at plant [Benefication]                    | Mass                                   | 0.0165 | kg   |
| RER: extrusion, plastic film [processing]                                                | Mass                                   | 0.0733 | kg   |
| RER: nitrogen, liquid, at plant [inorganics]                                             | Mass                                   | 0.01   | kg   |
| RER: polyethylene, LDPE, granulate, at plant [polymers]                                  | Mass                                   | 0.0733 | kg   |
| RER: sheet rolling, aluminum [processing]                                                | Mass                                   | 0.0165 | kg   |
| Stainless Steel Hot Rolled Sheet (ELCD) [Metals]                                         | Mass                                   | 0.0235 | kg   |
| Thermal energy (MJ) [Thermal energy]                                                     | Energy (net calorific value)           | 0.0652 | MJ   |
| RER: chemical plant, organics [organics]                                                 | Number of pieces                       | 4E-10  | pcs. |
| RER: transport, lorry >16t, fleet average [Street]                                       | Ecoinvent quantity ton kilometer (tkm) | 0.0278 | tkm  |
| US: transport, freight, rail, diesel [Railway]                                           | Ecoinvent quantity ton kilometer (tkm) | 0.0278 | tkm  |
| outputs                                                                                  |                                        |        |      |
| CN: single cell, lithium-ion battery, lithium manganese oxide/graphite, at plant [Parts] | Mass                                   | 1      | kg   |
| GLO: disposal, Li-ions batteries, mixed technology [Recycling]                           | Mass                                   | 0.0525 | kg   |
| Waste heat [Other emissions to air]                                                      | Energy (net calorific value)           | 0.38   | MJ   |

Table S19 Battery Management System

| Flow                                                                               | Quantity                     | Amount | Unit |
|------------------------------------------------------------------------------------|------------------------------|--------|------|
| Inputs                                                                             |                              |        |      |
| Copper wire [Metals]                                                               | Mass                         | 0.95   | kg   |
| Electricity [Electric power]                                                       | Energy (net calorific value) | 0.002  | MJ   |
| Testing Electricity                                                                | Energy (net calorific value) | 0.003  | MJ   |
| GLO: printed wiring board, surface mounted, unspec., solder mix, at plant [Module] | Mass                         | 0.05   | kg   |
| Stainless steel cold rolled coil (430) [Metals]                                    | Mass                         | 0.375  | kg   |
| Outputs                                                                            |                              |        |      |
| Battery BMS [Product model]                                                        | Mass                         | 1      | kg   |

Table S20 Pack housing

| Flow                                                  | Quantity                     | Amount | Unit |
|-------------------------------------------------------|------------------------------|--------|------|
| Inputs                                                |                              |        |      |
| Electricity [Electric power]                          | Energy (net calorific value) | 0.235  | MJ   |
| Testing Electricity                                   | Energy (net calorific value) | 0.0013 | MJ   |
| Polyethylene terephthalate granulate (PET) [Plastics] | Mass                         | 2      | kg   |
| Outputs                                               |                              |        |      |
| Battery Housing [Product model]                       | Mass                         | 1      | kg   |

The battery testing platform includes three key points: BMS development (Hardware-in-the-loop (HIL), BMS validation and verification), pack development (environmental testing, pack validation and verification), and pack manufacturing (end of line functional testing, pack cycling and balancing).

Table S2119 Passive cooling system

| Flow                                            | Quantity                     | Amount | Unit |
|-------------------------------------------------|------------------------------|--------|------|
| Inputs                                          |                              |        |      |
| Electricity [Electric power]                    | Energy (net calorific value) | 0.002  | MJ   |
| Testing Electricity                             | Energy (net calorific value) | 0.005  | MJ   |
| Stainless steel cold rolled coil (430) [Metals] | Mass                         | 1      | kg   |
| Outputs                                         |                              |        |      |
| Battery Cooling [Product model]                 | Mass                         | 1      | kg   |

Table S2220 Assembly of battery

| Flow   | Quantity | Amount | Unit |
|--------|----------|--------|------|
| Inputs |          |        |      |



|                                                                                          |                                        |          |      |
|------------------------------------------------------------------------------------------|----------------------------------------|----------|------|
| Battery BMS [Product model]                                                              | Mass                                   | 0.37528  | kg   |
| Battery Cooling [Product model]                                                          | Mass                                   | 0.145    | kg   |
| Battery Housing [Product model]                                                          | Mass                                   | 0.145    | kg   |
| CN: single cell, lithium-ion battery, lithium manganese oxide/graphite, at plant [Parts] | Mass                                   | 0.799    | kg   |
| Electricity [Electric power]                                                             | Energy (net calorific value)           | 0.3888   | MJ   |
| Testing Electricity                                                                      | Energy (net calorific value)           | 0.021    | MJ   |
| GLO: cable, three-conductor cable, at plant [Parts]                                      | Length                                 | 0.373    | m    |
| OCE: transport, transoceanic freight ship [Water]                                        | Ecoinvent quantity ton kilometer (tkm) | 7.81     | tkm  |
| RER: metal working factory [General manufacturing]                                       | Number of pieces                       | 4.58E-10 | pcs. |
| RER: transport, lorry >16t, fleet average [Street]                                       | Ecoinvent quantity ton kilometer (tkm) | 1.02     | tkm  |
| outputs                                                                                  |                                        |          |      |
| GLO: battery, LiIo, rechargeable, prismatic, at plant [Module]                           | Mass                                   | 1        | kg   |
| Waste heat [Other emissions to air]                                                      | Energy (net calorific value)           | 0.378    | MJ   |

Table S213 Life cycle inventories of End of life

| Material  | Recycling process  | Energy consumption (MJ/kg) | Reference |
|-----------|--------------------|----------------------------|-----------|
| Steel     | Physical           | 52                         | 5         |
| Aluminum  | Physical           | 49                         | 5         |
| Copper    | Physical           | 75                         | 5         |
| Plastic   | Physical           | 31                         | 5         |
| Li        | Hydrometallurgical | 73                         | 6         |
| Cobalt    | Pyrometallurgical  | 17                         | 7         |
| Manganese | Pyrometallurgical  | 22                         | 7         |
| Nickel    | Pyrometallurgical  | 27                         | 7         |

## Life Cycle Impact Assessment

Table S224 Environmental impacts by 6 main life cycle stages for EV lithium-ion battery pack (NMC-SiNW)

|                                 | Material extraction | Material processing | Component manufacture | Battery assembly | Battery use | End of life |
|---------------------------------|---------------------|---------------------|-----------------------|------------------|-------------|-------------|
| ADP(kg Sb-eq/km)                | 0.0002              | 3.781E-04           | 2.24E-05              | 6.25E-05         | 7.06E-04    | 2.37E-05    |
| GWP (kg CO <sub>2</sub> -eq/km) | 0.0187              | 0.0476572           | 0.00346904            | 0.00717          | 0.1051      | 0.00582     |

|                          |          |           |             |          |          |          |
|--------------------------|----------|-----------|-------------|----------|----------|----------|
| AP(kg H+ Mol-<br>eq/km)  | 0.015    | 0.0121655 | 0.0010411   | 0.00303  | 0.0458   | 0.0104   |
| EP(kg N-eq/km)           | 9.1E-07  | 7.192E-06 | 6.97341E-07 | 8.71E-07 | 1.21E-05 | 2.03E-06 |
| ODP(kg CFC 11-<br>eq/km) | 5.51E-10 | 6.8E-11   | 4.68E-11    | 1.11E-11 | 8.59E-12 | 2.69E-10 |
| POP(kg O3-<br>eq/km)     | 0.000951 | 0.0037176 | 5.9292E-05  | 0.000453 | 0.00641  | 2.47E-04 |
| ETP(PAF m3<br>day/km)    | 0.00244  | 1.807E-05 | 4.5629E-07  | 2.95E-06 | 4.08E-05 | 3.56E-04 |
| HTP(cases/km)            | 2.96E-13 | 1.659E-12 | 6.15162E-14 | 1.47E-13 | 2.3E-12  | 6.23E-14 |

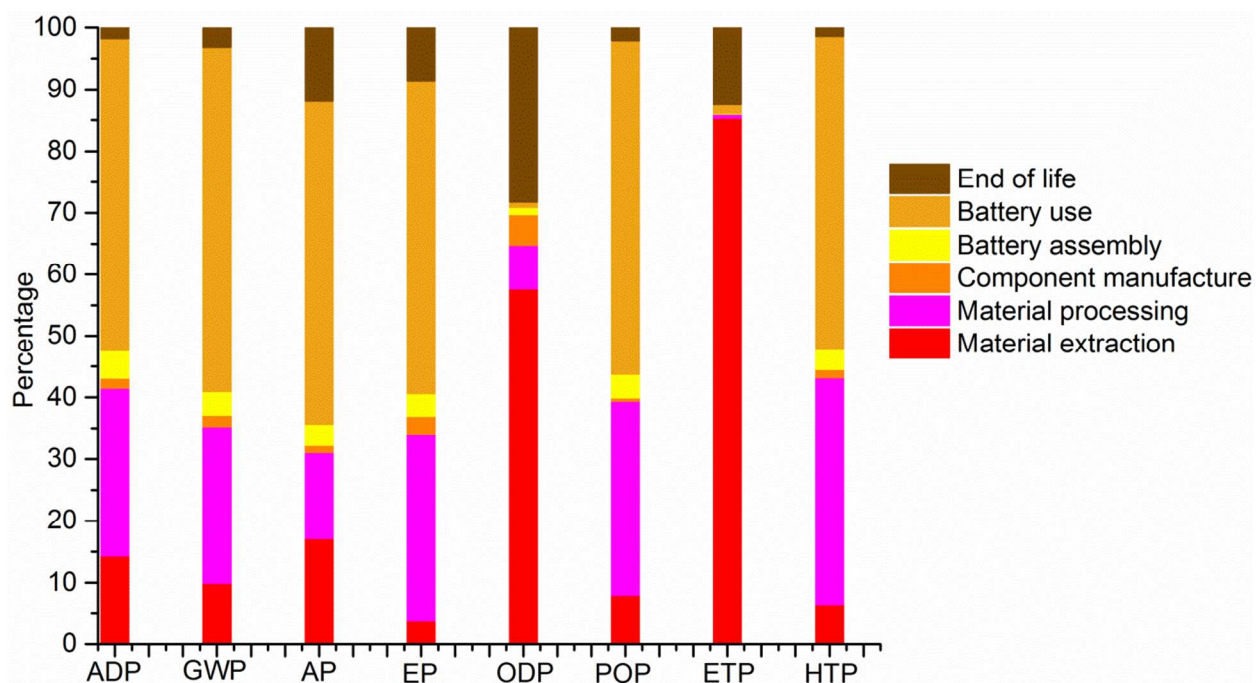

Figure S3 Environmental impacts from 6 main life cycle stages for EV lithium-ion battery pack (NMC-SiNW)

Table S235 Cradle-to-gate environmental impacts of battery components (NMC-SiNW)

|                        | Anode   | Cathode  | Separator | Electrolyte | Cell casing | BMS   | Pack housing | Passive cooling |
|------------------------|---------|----------|-----------|-------------|-------------|-------|--------------|-----------------|
| ADP(kg Sb-<br>eq/km)   | 2.5E-04 | 5.7E-05  | 1.715E-06 | 2.376E-05   | 1.642E-05   | 4E-06 | 7.149E-06    | 6.415E-05       |
| GWP (kg CO2-<br>eq/km) | 2.8E-02 | 1.05E-02 | 1.769E-04 | 3.154E-03   | 9.785E-04   | 9E-04 | 1.352E-03    | 7.301E-03       |

|                         |         |          |           |           |           |       |           |           |
|-------------------------|---------|----------|-----------|-----------|-----------|-------|-----------|-----------|
| AP(kg H+ Mol-<br>eq/km) | 8.9E-03 | 1.45E-02 | 3.737E-05 | 7.798E-04 | 7.992E-04 | 4E-04 | 2.765E-04 | 3.110E-04 |
| EP(kg N-<br>eq/km)      | 4E-06   | 3.82E-06 | 2.938E-08 | 6.631E-07 | 1.804E-07 | 3E-07 | 4.32E-06  | 8.510E-07 |
| ODP(kg CFC<br>11-eq/km) | 7.1E-11 | 3.43E-10 | 5.033E-11 | 7.517E-11 | 6.437E-14 | 2E-11 | 3.823E-12 | 1.160E-11 |
| POP(kg O3-<br>eq/km)    | 2.1E-03 | 7.65E-04 | 1.056E-05 | 1.717E-04 | 5.551E-05 | 5E-05 | 4.622E-05 | 4.450E-04 |
| ETP(PAF m3<br>day/km)   | 8.9E-06 | 4.38E-04 | 1.125E-07 | 3.089E-06 | 1.216E-06 | 7E-05 | 1.663E-03 | 2.916E-06 |
| HTP(cases/km)           | 4.4E-13 | 1.45E-13 | 2.765E-15 | 9.007E-14 | 2.7E-14   | 2E-14 | 5.702E-14 | 1.531E-13 |

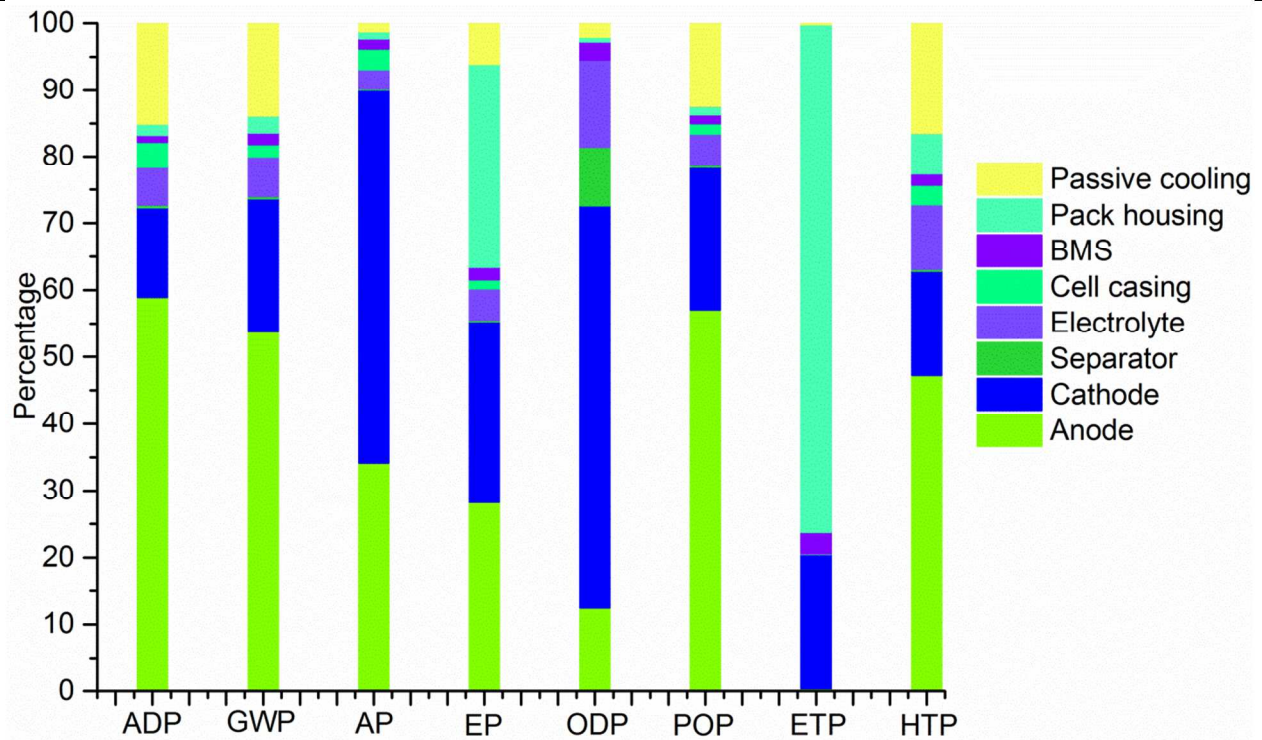

Figure S4 Cradle to gate environmental impacts of battery components

Table S246 Comparison with other studies

|                |                     | Battery production | Battery use | End of life |
|----------------|---------------------|--------------------|-------------|-------------|
| Energy (MJ/km) | NMC-SiNW            | 1.9632             | 1.4718      | 0.0547      |
|                | NMC-Graphite        | 0.4550             | 1.6800      | 0.0674      |
|                | Notter <sup>2</sup> | 0.2078             | 1.7         | 0.061       |

|                   |              |        |        |        |
|-------------------|--------------|--------|--------|--------|
|                   | Zackrisson   | 0.386  | 0.5076 | 0.032  |
| GWP(kg CO2-eq/km) | NMC-SiNW     | 0.0749 | 0.1051 | 0.0043 |
|                   | NMC-Graphite | 0.0287 | 0.12   | 0.0058 |
|                   | Notter       | 0.012  | 0.162  | 0.007  |
|                   | Zackrisson   | 0.0085 | 0.92   | 0.0065 |
| ADP(g Sb-eq/km)   | NMC-SiNW     | 0.5631 | 0.7061 | 0.0214 |
|                   | NMC-Graphite | 0.2004 | 0.806  | 0.0245 |
|                   | Notter       | 0.097  | 0.45   | 0.23   |

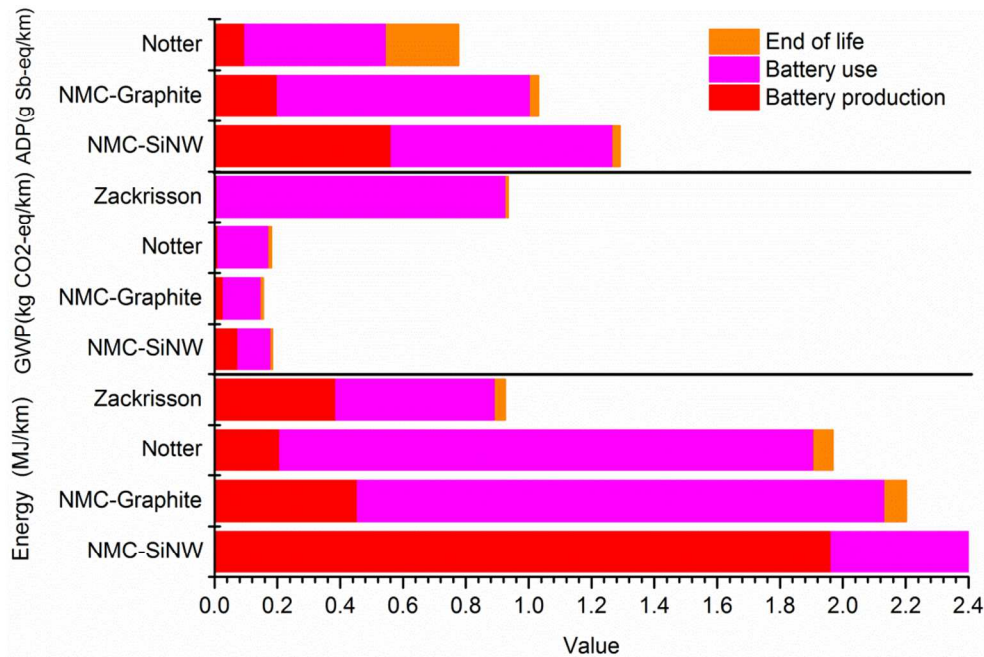

Figure S5 Comparison with other studies

Table S27 Impact saving in usage phase from the increased energy storage capacity and extended driving range

| Use phase                                       | Graphite battery | SiNW battery | Impact Savings |
|-------------------------------------------------|------------------|--------------|----------------|
| Total mass of battery pack (kg)                 | 360              | 120          | 66.67%         |
| Primary energy use in battery use phase (MJ/km) | 1.68             | 1.47         | 12.50%         |
| ADP(kg Sb-eq/km)                                | 0.000806         | 0.000706     | 12.42%         |

|                      |           |           |        |
|----------------------|-----------|-----------|--------|
| GWP(kg CO2-eq/km)    | 0.12      | 0.1051    | 13.42% |
| AP(kg H+ Mol-eq/km)  | 0.0523    | 0.0458    | 12.43% |
| EP(kg N-eq/km)       | 0.0000138 | 0.0000121 | 12.32% |
| ODP(kg CFC 11-eq/km) | 9.8E-12   | 8.59E-12  | 12.35% |
| POP(kg O3-eq/km)     | 0.00732   | 0.00641   | 12.43% |
| ETP(PAF m3 day/km)   | 0.0000466 | 0.0000408 | 12.45% |
| HTP(cases/km)        | 2.63E-12  | 2.3E-12   | 12.55% |

### Sensitivity Analysis

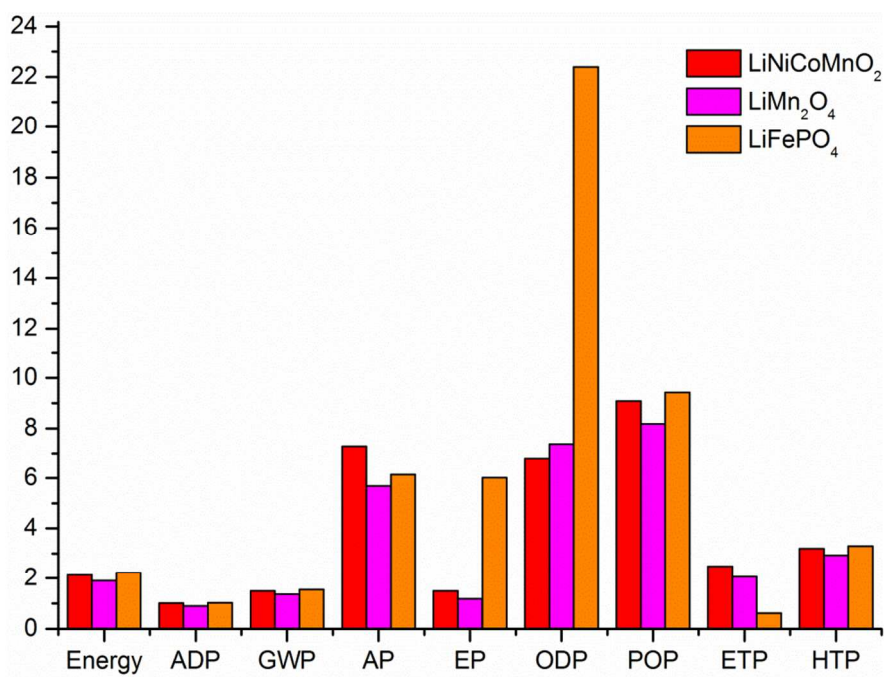

Figure S6 Sensitivity analysis of different lithium based cathodes

Table S258 Sensitivity analysis of different lithium based cathodes

|                    | NMC  | LiMn <sub>2</sub> O <sub>4</sub> | LiFePO <sub>4</sub> |
|--------------------|------|----------------------------------|---------------------|
| Energy use (MJ/km) | 2.13 | 1.91 (-10.32%)                   | 2.24 (5.16%)        |
| ADP(E-03)          | 1.01 | 0.9 (-10.89%)                    | 1.03 (1.98%)        |

|           |      |                |                |
|-----------|------|----------------|----------------|
| GWP(E-01) | 1.49 | 1.37 (-8.05%)  | 1.55 (4.03%)   |
| AP(E-02)  | 7.28 | 5.69 (-21.84%) | 6.14 (-15.66%) |
| EP(E-05)  | 1.49 | 1.18 (-20.81%) | 6.01 (303.36%) |
| ODP(E-10) | 6.81 | 7.37 (8.22%)   | 22.4 (228.93%) |
| POP(E-03) | 9.08 | 8.18 (-9.91%)  | 9.43 (3.85%)   |
| ETP(E-03) | 2.49 | 2.07 (-16.87%) | 0.625 (-74.89) |
| HTP(E-12) | 3.19 | 2.92 (-8.46%)  | 3.30 (3.44%)   |

EV is only powered by electricity, so the variation of life time of battery has direct effects on the environmental impacts of the battery use in EV. The sensitivity analysis showed linear relationship between the environmental impact in battery use phase and life time of battery, but insignificant variation of environmental impact in the whole life cycle of battery.

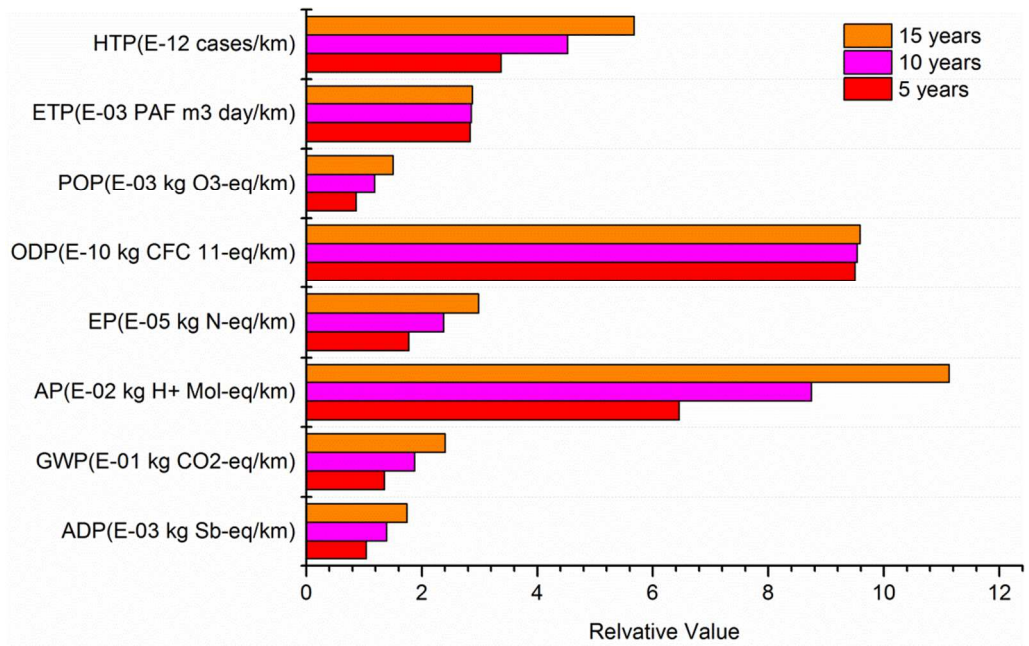

Figure S7 Sensitivity analysis of life time of battery. The relative value is the value in the unit in bracket for each environmental emission category

The variation of electricity grid mix results in considerable differences in the sensitivity analysis of real electricity mix in different states (Washington DC, Alaska, Maine, and Washington). The electricity generation mix in this study is the US average with composition of

89.56% nonrenewable sources (coal, oil and natural gas) and 10.44% renewable sources (nuclear, hydropower, biomass, wind, solar and geothermal).

Besides, the major impacts of the battery pack are from the grid electricity during its use phase. The electricity mix is different from different regions and addition of renewable energies such as solar, wind, and geothermal, could greatly reduce the impacts of the grid power supply. Here we investigated the sensitivity of the LCA results at Washington DC, Alaska, Maine, and Washington. Using eGrid data,<sup>8</sup> the characterized GWP and AP will increase by 104% and 462%, respectively in the Washington D.C., and will decrease by 76% and 93%, respectively, on the Washington State. The results are shown in Figure S8.

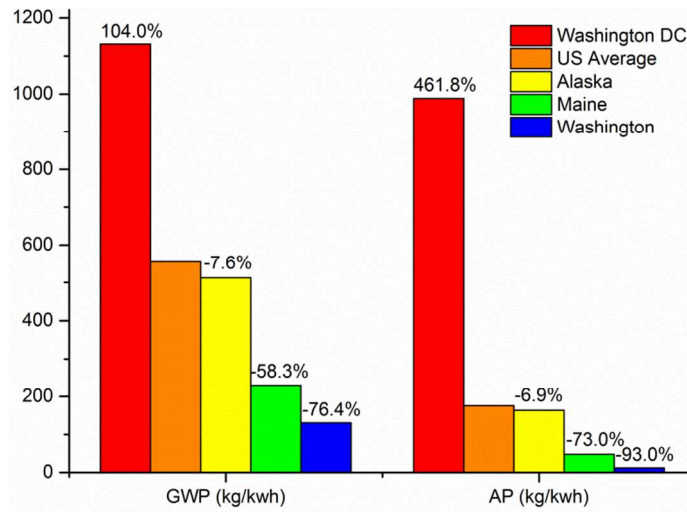

Figure S8 Sensitivity of real grid mix in selected four different US regions on GWP and AP

## References

1. Margolis, N. *Energy and environmental profile of the U.S. aluminum industry*; U.S. Department of Energy: Columbia, Maryland, July, 1997; p 119.

2. Notter, D. A.; Gauch, M.; Widmer, R.; Wager, P.; Stamp, A.; Zah, R.; Althaus, H. J., Contribution of Li-Ion Batteries to the Environmental Impact of Electric Vehicles. *Environ. Sci. Technol.* **2010**, *44*, (17), 6550-6556.
3. Xakalashé, B. S.; Tangstad, M., Silicon processing: from quartz to crystalline silicon solar cells. In *Southern African Pyrometallurgy 2011*, Jones, R. T.; Hoed, P. d., Eds. Johannesburg, South Africa, 2011; p 35.
4. Jankovic, A., Variables affecting the fine grinding of minerals using stirred mills. *Miner Eng* **2003**, *16*, (4), 337-345.
5. Ra, D. I.; Han, K. S., Used lithium ion rechargeable battery recycling using Etoile-Rebatt technology. *J. Power. Sources.* **2006**, *163*, (1), 284-288.
6. Li, L.; Zhang, Z.; Li, B.; Gao, F.; Li, L. Q.; Jonas, J. B., E-cadherin and beta-catenin expression in sebaceous eyelid adenocarcinomas. *Graefes Arch. Clin. Exp. Ophthalmol.* **2011**, *249*, (12), 1867-1873.
7. Cheret, D.; Santen, S. Battery recycling. US7169206 B2, January 30, 2007.
8. U.S. EPA *The Emissions & Generation Resource Integrated Database (eGRID) 2012 Version 1.0*; DOE/EE-0603; The U.S. Environmental Protection Agency: Washington, D.C., May 10, 2012.
